# Supplementary material for: Safety and applicability of a pre-stage public access ventilator for trained laypersons: a proof of principle study
Source: PubMed Central journal article supplement (PMC5716260; doi:10.1186/s12873-017-0150-5), 2017-12-04

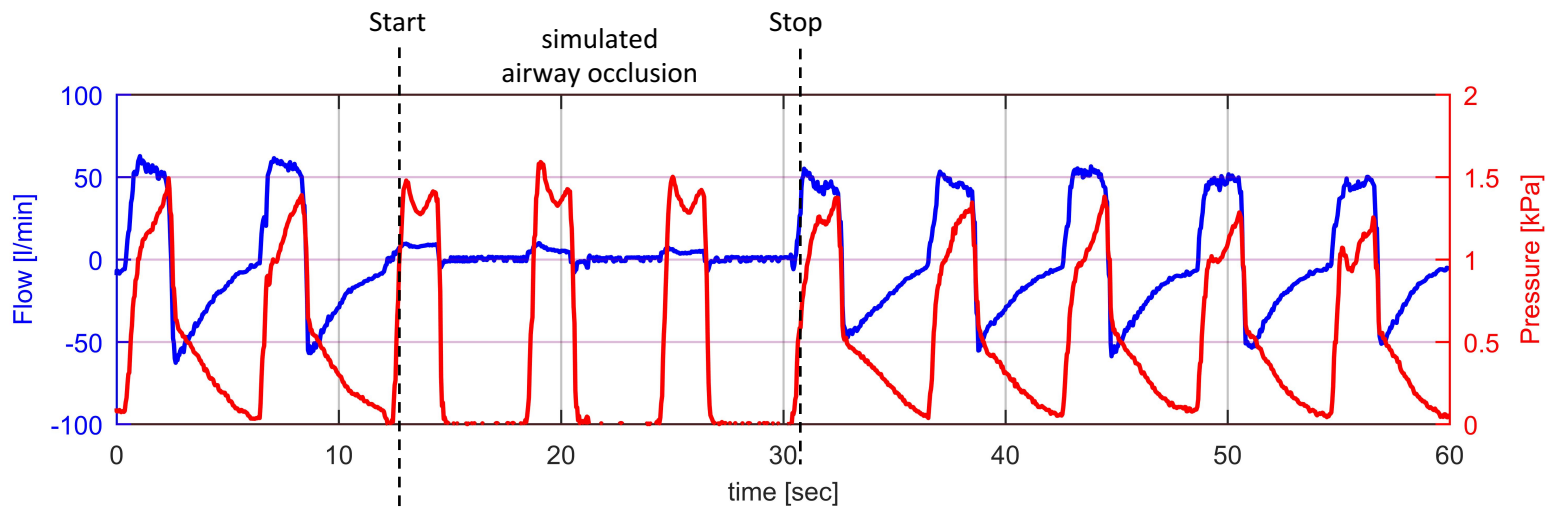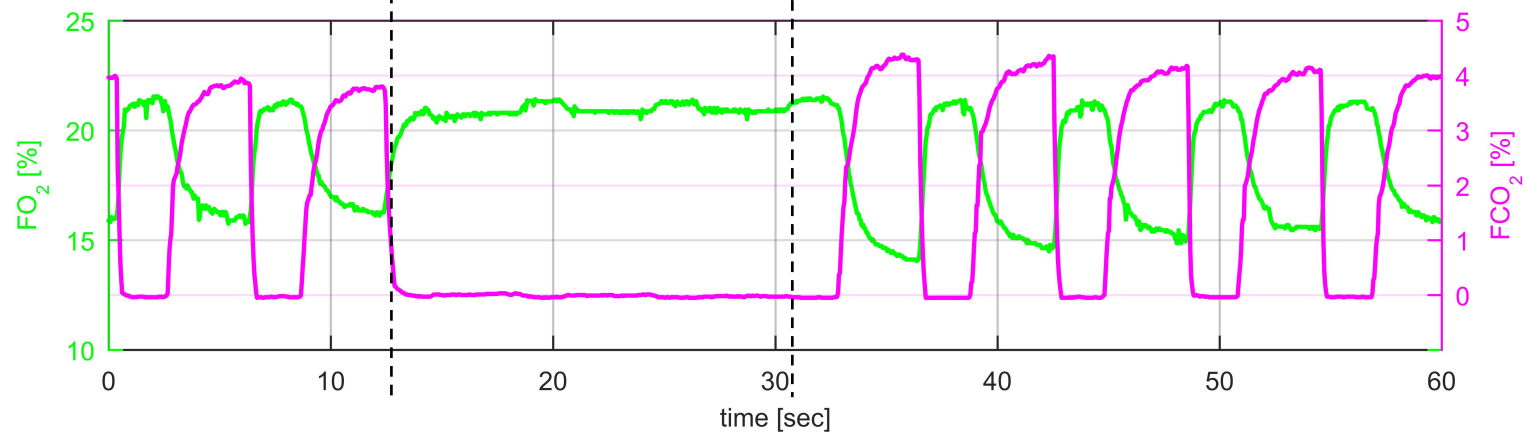

Supplement: 12873_2017_150_MOESM3_ESM.pdf [file 12873_2017_150_MOESM3_ESM.pdf]
